# Supplementary material for: Cell-free supernatants from cultures of lactic acid bacteria isolated from fermented grape as biocontrol against Salmonella Typhi and Salmonella Typhimurium virulence via autoinducer-2 and biofilm interference
Source: PeerJ. 2019 Aug 26;7:e7555. doi: 10.7717/peerj.7555 (PMC6715067; doi:10.7717/peerj.7555)
Supplement: Table S1 — The mean and standard deviation of each treatment were calculated based on three replicates. In addition, the different significance in statistical analysis were also investigated at p-value less than 0.05. [file peerj-07-7555-s001.xlsx]

## Sheet: Agar well diffusion
								Descriptives												Data_STP_CFCS_agarwell
								Data_STP_CFCS_agarwell												Tukey Ba
	Salmonella Typhi									N	Mean	Std. Deviation	Std. Error	95% Confidence Interval for Mean		Minimum	Maximum	Between- Component Variance		list_STP_CFCS_agarwell	N	Subset for alpha = 0.05
	LAB-CFCS	Halo clear zone (mm)			Aver	SD								Lower Bound	Upper Bound							1	2	3	4	5
	WM1	5	4.5	5	4.83333	0.288675		1		3	4.83333	0.288675	0.166667	4.11622	5.55044	4.5	5			11	3	3
	WM2	3.5	3.5	3.5	3.5	0		2		3	3.5	0	0	3.5	3.5	3.5	3.5			12	3	3.16667
	WM3	4.2	2.8	3.5	3.5	0.7		3		3	3.5	0.7	0.404145	1.7611	5.2389	2.8	4.2			6	3	3.35
	WM5	5.5	4	5	4.83333	0.763763		4		3	4.83333	0.763763	0.440959	2.93604	6.73062	4	5.5			2	3	3.5	3.5
	WM6	3.5	4.5	3.5	3.83333	0.57735		5		3	3.83333	0.57735	0.333333	2.39912	5.26755	3.5	4.5			3	3	3.5	3.5
	WM8	3.15	3.8	3.1	3.35	0.390512		6		3	3.35	0.390512	0.225462	2.37991	4.32009	3.1	3.8			7	3	3.5	3.5
	WM11	4	3.5	3	3.5	0.5		7		3	3.5	0.5	0.288675	2.25793	4.74207	3	4			10	3	3.5	3.5
	WM12	4	3.5	4	3.83333	0.288675		8		3	3.83333	0.288675	0.166667	3.11622	4.55044	3.5	4			9	3	3.75	3.75	3.75
	WM19	4	3.5	3.75	3.75	0.25		9		3	3.75	0.25	0.144338	3.12897	4.37103	3.5	4			5	3	3.83333	3.83333	3.83333
	WM33	3.5	3.5	3.5	3.5	0		10		3	3.5	0	0	3.5	3.5	3.5	3.5			8	3	3.83333	3.83333	3.83333
	WM34	3	3	3	3	0		11		3	3	0	0	3	3	3	3			15	3		4.66667	4.66667
	WM36	3	3	3.5	3.16667	0.288675		12		3	3.16667	0.288675	0.166667	2.44956	3.88378	3	3.5			1	3			4.83333
	PR1	6.5	6	6	6.16667	0.288675		13		3	6.16667	0.288675	0.166667	5.44956	6.88378	6	6.5			4	3			4.83333
	PR2	6.5	7	6.5	6.66667	0.288675		14		3	6.66667	0.288675	0.166667	5.94956	7.38378	6.5	7			16	3				6
	PR14	4.5	4.5	5	4.66667	0.288675		15		3	4.66667	0.288675	0.166667	3.94956	5.38378	4.5	5			13	3				6.16667
	FC14	6	6	6	6	0		16		3	6	0	0	6	6	6	6			14	3				6.66667
	Amplicilin	7	8.5	7.75	7.75	0.75		17		3	7.75	0.75	0.433013	5.8869	9.6131	7	8.5			17	3					7.75
								Total		51	4.46176	1.41282	0.197834	4.0644	4.85913	2.8	8.5
								Model	Fixed Effects			0.415449	0.0581745	4.34354	4.57999
									Random Effects				0.339287	3.74251	5.18102			1.89944
								Descriptives												data_STM_CFCS_agarwell
								data_STM_CFCS_agarwell												Tukey Ba
	Salmonella Typhimurium									N	Mean	Std. Deviation	Std. Error	95% Confidence Interval for Mean		Minimum	Maximum	Between- Component Variance		list_STM_CFCS_agarwell	N	Subset for alpha = 0.05
	LAB-CFCS	Halo clear zone (mm)			Aver	SD								Lower Bound	Upper Bound							1	2	3
	WM19	6.1	6.45	6.2	6.25	0.180278		1		3	6.25	0.180278	0.104083	5.80217	6.69783	6.1	6.45			2	3	4.25
	WM33	4.1	4.15	4.5	4.25	0.217945		2		3	4.25	0.217945	0.125831	3.70859	4.79141	4.1	4.5			3	3	5.25	5.25
	WM34	5.4	5.1	5.25	5.25	0.15		3		3	5.25	0.15	0.0866025	4.87738	5.62262	5.1	5.4			1	3		6.25
	WM36	5.5	7	6.25	6.25	0.75		4		3	6.25	0.75	0.433013	4.3869	8.1131	5.5	7			4	3		6.25
	Amplicilin	10.3	8.2	8.5	9	1.13578		5		3	9	1.13578	0.655744	6.17856	11.8214	8.2	10.3			5	3			9
								Total		15	6.2	1.72295	0.444865	5.24586	7.15414	4.1	10.3
								Model	Fixed Effects			0.6253	0.161452	5.84026	6.55974
									Random Effects				0.792149	4.00064	8.39936			3.00717
