# Supplementary material for: Cell-free supernatants from cultures of lactic acid bacteria isolated from fermented grape as biocontrol against Salmonella Typhi and Salmonella Typhimurium virulence via autoinducer-2 and biofilm interference
Source: PeerJ. 2019 Aug 26;7:e7555. doi: 10.7717/peerj.7555 (PMC6715067; doi:10.7717/peerj.7555)
Supplement: Table S2 — The mean and standard deviation of each treatment were calculated based on three replicates. In addition, the different significance in statistical analysis were also investigated at p-value less than 0.05. [file peerj-07-7555-s002.xlsx]

## Sheet: Biofilm inhibition
												Descriptives										STMbiofilminhbition
												STMbiofilminhbition										Tukey HSDa
	Salmonella Typhimurium												N	Mean	Std. Deviation	Std. Error	95% Confidence Interval for Mean		Minimum	Maximum		GroupLAB	N	Subset for alpha = 0.05
	LAB-CFCS	BIC	Treatment OD545			%inhibition			Aver	SD							Lower Bound	Upper Bound						1	2	3	4
	WM19	15	0.435	0.423	0.427	45.0758	46.5909	46.0859	45.9175	0.771477		1	3	45.9175	0.771477	0.445413	44.0011	47.834	45.0758	46.5909		1	3	45.9175
	WM33	15	0.266	0.264	0.267	66.4141	66.6667	66.2879	66.4562	0.192869		2	3	66.4562	0.192869	0.111353	65.9771	66.9353	66.2879	66.6667		3	3		52.7357
	WM34	20	0.375	0.373	0.375	52.6515	52.904	52.6515	52.7357	0.145796		3	3	52.7357	0.145796	0.0841751	52.3735	53.0979	52.6515	52.904		2	3			66.4562
	WM36	20	0.2	0.198	0.2	74.7475	75	74.7475	74.8316	0.145796		4	3	74.8316	0.145796	0.0841751	74.4695	75.1938	74.7475	75		4	3				74.8316
	Control		0.788	0.793	0.795							Total	12	59.9853	11.8306	3.4152	52.4685	67.5021	45.0758	75		Sig.		1	1	1	1
				Aver Control	0.792
												Descriptives										STPbiofilminhibition
												STPbiofilminhibition										Tukey HSDa
	Salmonella Typhi												N	Mean	Std. Deviation	Std. Error	95% Confidence Interval for Mean		Minimum	Maximum		GroupLAB	N	Subset for alpha = 0.05
	LAB-CFCS	BIC	Treatment OD545			%inhibition			Aver	SD							Lower Bound	Upper Bound						1	2
	WM19	20	0.191	0.206	0.209	95.1338	94.7516	94.6752	94.8535	0.245698		1	3	94.8535	0.245698	0.141854	94.2432	95.4639	94.6752	95.1338		1	3	94.8535
	WM33	20	0.195	0.198	0.198	95.0318	94.9554	94.9554	94.9809	0.0441287		2	3	94.9809	0.0441287	0.0254777	94.8713	95.0905	94.9554	95.0318		2	3	94.9809
	WM34	30	0.156	0.151	0.153	96.0255	96.1529	96.1019	96.0934	0.0641175		3	3	96.0934	0.0641175	0.0370182	95.9341	96.2527	96.0255	96.1529		4	3		95.6773
	WM36	20	0.158	0.173	0.178	95.9745	95.5924	95.465	95.6773	0.26518		4	3	95.6773	0.26518	0.153102	95.0185	96.336	95.465	95.9745		3	3		96.0934
	Control		3.925	3.924	3.926							Total	12	95.4013	0.553464	0.159771	95.0496	95.7529	94.6752	96.1529		Sig.		0.832555	0.0938164
				Aver control	3.925
