# Supplementary material for: Cell-free supernatants from cultures of lactic acid bacteria isolated from fermented grape as biocontrol against Salmonella Typhi and Salmonella Typhimurium virulence via autoinducer-2 and biofilm interference
Source: PeerJ. 2019 Aug 26;7:e7555. doi: 10.7717/peerj.7555 (PMC6715067; doi:10.7717/peerj.7555)
Supplement: Table S3 — The mean and standard deviation of each treatment were calculated based on three replicate. In addition, the different significance in statistical analysis were also investigated at p-value less than 0.05. [file peerj-07-7555-s003.xlsx]

## Sheet: Autoinducer-2 activity
											Descriptives
											percent_ai2activity
													N	Mean	Std. Deviation	Std. Error	95% Confidence Interval for Mean		Minimum	Maximum	Between- Component Variance
	Strains	Treatment (RLUs)			% AI-2 activity			Aver	SD								Lower Bound	Upper Bound
	V. harveyi BB152	364298	395491	417146	100	100	100	100	0		1		3	100	0	0	100	100	100	100
	S. Typhimurium	201548	210674	201771	51.3744	53.7008	51.4312	52.1688	1.32703		2		3	52.1688	1.32703	0.766162	48.8723	55.4653	51.3744	53.7008
	S. Typhi	174745	199857	184272	44.5423	50.9434	46.9708	47.4855	3.23143		3		3	47.4855	3.23143	1.86566	39.4582	55.5128	44.5423	50.9434
											Total		9	66.5514	25.2288	8.4096	47.1589	85.944	44.5423	100
											Model	Fixed Effects			2.01686	0.672285	64.9064	68.1965
		Aver BB152	392312									Random Effects				16.7788	-5.64208	138.745			843.232
											percent_ai2activity
											Tukey HSDa
											listgroup	N	Subset for alpha = 0.05
													1	2
											3	3	47.4855
											2	3	52.1688
											1	3		100
											Sig.		0.0660711	1
