# Supplementary material for: Cell-free supernatants from cultures of lactic acid bacteria isolated from fermented grape as biocontrol against Salmonella Typhi and Salmonella Typhimurium virulence via autoinducer-2 and biofilm interference
Source: PeerJ. 2019 Aug 26;7:e7555. doi: 10.7717/peerj.7555 (PMC6715067; doi:10.7717/peerj.7555)
Supplement: Table S4 — The mean and standard deviation of each treatment were calculated based on three replicates. In addition, the different significance in statistical analysis were also investigated at p-value less than 0.05. [file peerj-07-7555-s004.xlsx]

## Sheet: autoinducer-2 inhibition
											Descriptives												AI2inhibitionSTP
	Salmonella Typhi										AI2inhibitionSTP												Tukey HSDa
	CFCS	Treatment (RLU)			AI-2 like inhibition activity			Aver	SD				N	Mean	Std. Deviation	Std. Error	95% Confidence Interval for Mean		Minimum	Maximum	Between- Component Variance		Group	N	Subset for alpha = 0.05
	WM19	247.667	202.007	200.624	99.5236	99.6114	99.6141	99.5831	0.0514918								Lower Bound	Upper Bound							1	2	3
	WM33	343.136	312.697	257.352	99.34	99.3985	99.505	99.4145	0.0836535		1		3	99.5831	0.0514918	0.0297288	99.4551	99.711	99.5236	99.6141			3	3	99.1909
	WM34	463.511	410.933	387.412	99.1084	99.2096	99.2548	99.1909	0.0749452		2		3	99.4145	0.0836535	0.0482973	99.2067	99.6223	99.34	99.505			2	3	99.4145	99.4145
	WM36	153.581	52.577	37.357	99.7046	99.8989	99.9281	99.8439	0.121504		3		3	99.1909	0.0749452	0.0432696	99.0048	99.3771	99.1084	99.2548			1	3		99.5831
	positive control	46818.2	47291.2	61857							4		3	99.8439	0.121504	0.0701503	99.542	100.146	99.7046	99.9281			4	3			99.8439
											Total		12	99.5081	0.259926	0.0750343	99.3429	99.6732	99.1084	99.9281			Sig.		0.0530715	0.158154	1
			Aver RLU	51988.8							Model	Fixed Effects			0.0866448	0.0250122	99.4504	99.5658
												Random Effects				0.137752	99.0697	99.9465			0.0733998
											Descriptives												AI2inhibitionSTM
											AI2inhibitionSTM												Tukey HSDa
	Salmonella Typhimurium												N	Mean	Std. Deviation	Std. Error	95% Confidence Interval for Mean		Minimum	Maximum	Between- Component Variance		Group	N	Subset for alpha = 0.05
	CFCS	Treatment (RLU)			AI-2 like inhibition activity			Aver	SD								Lower Bound	Upper Bound							1	2	3
	WM19	66.362	41.18	61.918	99.9762	99.9852	99.9778	99.9797	0.00482009		1		3	99.9797	0.0048201	0.00278288	99.9678	99.9917	99.9762	99.9852			4	3	99.9692
	WM33	36.736	47.105	37.479	99.9868	99.9831	99.9866	99.9855	0.00207422		2		3	99.9855	0.00207423	0.00119755	99.9803	99.9907	99.9831	99.9868			3	3		99.9773
	WM34	67.843	66.362	55.448	99.9757	99.9762	99.9801	99.9773	0.00242758		3		3	99.9773	0.00242758	0.00140156	99.9713	99.9834	99.9757	99.9801			1	3		99.9797	99.9797
	WM36	87.1	84.494	86.008	99.9688	99.9697	99.9692	99.9692	0.000469311		4		3	99.9692	0.000469313	0.000270958	99.968	99.9704	99.9688	99.9697			2	3			99.9855
	positive control	294096	294593	247865							Total		12	99.9779	0.0065943	0.00190361	99.9738	99.9821	99.9688	99.9868			Sig.		1	0.743528	0.148134
											Model	Fixed Effects			0.00290039	0.000837272	99.976	99.9799
			Aver RLU	278852								Random Effects				0.00337899	99.9672	99.9887			4.28663e-05
