# Supplementary material for: Cell-free supernatants from cultures of lactic acid bacteria isolated from fermented grape as biocontrol against Salmonella Typhi and Salmonella Typhimurium virulence via autoinducer-2 and biofilm interference
Source: PeerJ. 2019 Aug 26;7:e7555. doi: 10.7717/peerj.7555 (PMC6715067; doi:10.7717/peerj.7555)
Supplement: Table S5 — Bacterial growth curve was plotted by the normalized absorbance at 600 nm versus the incubation time. [file peerj-07-7555-s005.xlsx]

## Sheet: BB170 growth with 5% CFCS
	The growth of reporter V. harveyi BB170 in the presence of 5% (v/v) CFCS
	WM33	nornalized OD at 600 nm			Aver
	0	0	0	0	0
	2	0.00135	-0.00175	0.00025	-5e-05
	4	0.0043	0.0008	0.0013	0.00213333
	8	0.0162	0.0165	0.013	0.0152333
	10	0.03075	0.02985	0.02905	0.0298833
	12	0.0522	0.0542	0.0562	0.0542
	16	0.1122	0.1061	0.1014	0.106567
	18	0.1437	0.1331	0.1298	0.135533
	20	0.18125	0.16805	0.16415	0.17115
	24	0.24595	0.23475	0.22775	0.23615
	WM36	OD			Aver
	0	0	0	0	0
	2	0.00015	-0.00055	-0.00015	-0.000183333
	4	0.001	-0.0001	0.0007	0.000533333
	8	0.0018	0.0009	0.0022	0.00163333
	10	0.00375	0.00345	0.00515	0.00411667
	12	0.0087	0.011	0.0151	0.0116
	16	0.0403	0.0453	0.0605	0.0487
	18	0.0757	0.0721	0.0889	0.0789
	20	0.10765	0.10775	0.12825	0.11455
	24	0.17265	0.17925	0.21095	0.187617
	WM19	OD			Aver
	0	0	0	0	0
	2	0.0004	0.0004	0.0004	0.0004
	4	0.0029	0.0028	0.00285	0.00285
	8	0.0412	0.039	0.0401	0.0401
	10	0.08695	0.08505	0.086	0.086
	12	0.1385	0.1391	0.1388	0.1388
	16	0.28405	0.27915	0.2816	0.2816
	18	0.3384	0.3561	0.34725	0.34725
	20	0.4042	0.4389	0.42155	0.42155
	24	0.5391	0.5785	0.5588	0.5588
	WM34	OD			Aver
	0	0	0	0	0
	2	-0.0028	1.38778e-17	-0.0014	-0.0014
	4	0.002	0.002	0.002	0.002
	8	0.0389	0.0426	0.04075	0.04075
	10	0.08205	0.08915	0.0856	0.0856
	12	0.1322	0.1372	0.1347	0.1347
	16	0.26285	0.25525	0.25905	0.25905
	18	0.3219	0.339	0.33045	0.33045
	20	0.3635	0.3551	0.3593	0.3593
	24	0.4376	0.4412	0.4394	0.4394
